# Supplementary material for: Navigating antenatal care: The lived experiences of adolescent girls and young women and caregiver perspectives in Zambia
Source: PubMed Central journal article supplement — Womens Health (Lond). 2024 Sep 26;20:17455057241281482. doi: 10.1177/17455057241281482 (PMC11526215; doi:10.1177/17455057241281482), 2024-09-26
Supplement: sj-pdf-2-whe-10.1177_17455057241281482.pdf [file sj-pdf-2-whe-10.1177_17455057241281482.pdf]

\_\_\_\_\_  
Participant ID (PTID)

\_\_\_\_\_  
Staff Initials

\_\_\_\_/\_\_\_\_/\_\_\_\_  
Date of Interview (dd/MMM/yy)

### AGYW Questionnaire and In-depth Interview

**Note:** These questions add on to what has already been collected at baseline and follow-up and pertain to only participants that are were recently pregnant (within the last 24 months) and have given birth at least 3 months before the interview. The aim is to understand their experiences seeking, accessing, and utilizing perinatal services (Antenatal and Postnatal care).

#### **INSTRUCTIONS for the Interviewer: How to use the IDI Guide**

1. Section topics are shaded in gray.
2. *Instructions/suggestions to interviewer are in italics and [brackets].*
3. Not ALL questions need to be asked. It is up to your discretion if a question should be skipped if the participant has already provided a response to the question earlier in the interview. Please ensure that by the end of the interview, all the topics and key themes have been covered.
4. There are two levels of questions:
  - a. Primary interview questions: appear in **bold** text. They address the topics that you as the interviewer should ask and discuss with participants. You are not required to read them verbatim, but they are written to ensure some consistency across IDIs.
  - b. Probing topics are indicated with a bullet. If you find that the participant does not provide much information in response to the primary question, these probing topics may be used to encourage further discussion. Depending on what has already been discussed, and the IDI context, you may or may not ask the rest of the probes. Probes with the words “**KEY PROBE**” written before them are the most important to try to address. Depending on what has already been discussed, and the IDI context, you may or may not ask the rest of the probes.
5. Words found in (parentheses) are meant to provide wording options to interviewers to fit various situations. For example, they often provide a present or past tense verb.
6. The IDI guide is not meant to be used to take notes. Rather, you should use separate notetaking paper, where you will also include your initials, the participant’s PTID, as well as the date, start and end time of the interview.

**Before starting the IDI, ensure that the participant has provided written informed consent.**

*[Interviewer should explain the following points – PLEASE DO NOT READ VERBATIM:]*

- Purpose of IDI:
  - Understand the participant’s attitudes about and experiences with accessing and utilizing ANC or PNC services
- Affirm that all answers are valid: there are no right or wrong answers.
- Remind participant that interview is confidential, so identifying information won’t be shared outside of the study. Participants will remain anonymous in any external publications or presentations.
- Tell participant to use pseudonyms for themselves and anyone else they mention so as to preserve confidentiality.

Participant ID (PTID)

Staff Initials

Date of Interview (dd/MMM/yy)

Turn audio recorder on and then ask participant to confirm for audio recorder that they agree to participate in the IDI.  
*[Be sure to get a verbal confirmation before continuing.]*

### Section 1: Antenatal and Postnatal Care

Interviewer: This section, I want you to really explain your experience during pregnancy and after delivery. Remember there are no right or wrong answers – only you are the expert in your experience. If I don't ask you something but you want to provide other information, please feel free to add. The more information we get from you the better. I'm going to ask you questions about how easier or difficult it was accessing services during pregnancy and after delivery. When you answer, think about all the different people you interact with (e.g., family, friends, community, clinics etc.) and your interactions with all these levels during your pregnancy and post-delivery experience and any support that was provided. Any questions before we start?

NOTE: PLEASE MAKE SURE TO PROBE ON THE DIFFERENT LEVELS, ESPECIALLY THE CLINIC AND FAMILY LEVELS.  
Note questions down on the guide that come up during the interview.

- |    |                                                                                                                                                                                                                                                                                                                                                                                                                                                                                                                                                                                                                                                                                                                                                                              |
|----|------------------------------------------------------------------------------------------------------------------------------------------------------------------------------------------------------------------------------------------------------------------------------------------------------------------------------------------------------------------------------------------------------------------------------------------------------------------------------------------------------------------------------------------------------------------------------------------------------------------------------------------------------------------------------------------------------------------------------------------------------------------------------|
| 1. | <p><b>Tell me about your experience attending antenatal care clinic.</b></p> <ul style="list-style-type: none"><li>• <b>KEY PROBE:</b> After how many months after you found out you were pregnant did you attend your first antenatal visit?</li><li>• <b>KEY PROBE:</b> What helped you be able to start your antenatal visits?</li><li>• <b>KEY PROBE:</b> What challenges or barriers did you face starting your antenatal visits?</li><li>• <b>KEY PROBE:</b> What helped you be able to continue your antenatal care visits?</li><li>• <b>KEY PROBE:</b> What challenges or barriers did you face in continuing your antenatal care clinic?</li><li>• Probe on the different levels that the AGYW interacts with ((e.g., family/friends, community, clinic).</li></ul> |
| 2. | <p><b>I would now like to talk about your birthing experience.</b></p> <ul style="list-style-type: none"><li>• <b>KEY PROBE:</b> What made it easier for you to give birth a health facility?</li><li>• <b>KEY PROBE:</b> Did you face any challenges giving birth at a health facility? If so, what were those challenges?</li><li>• Probe on the different levels that the AGYW interacts with(e.g., family/friends, community, clinic).</li></ul>                                                                                                                                                                                                                                                                                                                         |
| 3. | <p><b>Now, please tell me about your postnatal experience.</b></p> <ul style="list-style-type: none"><li>• <b>KEY PROBE:</b> What made it easy to start postnatal care for you and your child?</li><li>• <b>KEY PROBE:</b> What challenges did you face in starting your postnatal care?</li><li>• <b>KEY PROBE:</b> What has/made it easy for you to continue your postnatal care?</li><li>• <b>KEY PROBE:</b> What challenges did or have you faced in continuing your postnatal care?</li><li>• Probe on the different levels that the AGYW interacts with (e.g., family/friends, community, clinic).</li></ul>                                                                                                                                                           |
| 4. | <p><b>Tell me about your breastfeeding experience.</b></p> <ul style="list-style-type: none"><li>• <b>KEY PROBE:</b> What made/has made it easy to breastfeed exclusively? How about to continue breastfeeding after the 6 months recommended?</li><li>• <b>KEY PROBE:</b> What challenges did you face breastfeeding exclusively? How about continuing to breastfeed beyond the 6 months recommended?</li></ul>                                                                                                                                                                                                                                                                                                                                                             |

### Section 2. Sexual reproductive health

Interviewer: Thank you. Now we are going to move into more open-ended questions regarding your sexual and reproductive health. As you respond to these questions, try to reflect back to your pregnancy experience and even now after delivery. Again, there is no right or wrong answer.

Participant ID (PTID)

Staff Initials

Date of Interview (dd/MMM/yy)

**If HIV negative**

**5a. What are your thoughts on HIV and its impact on your health?**

- Are you aware of ways that you can prevent HIV – outside of condoms?
- Would you like to know more about PrEP- a pill or injection you can take to prevent HIV?
- **KEY PROBE:** Did you use any HIV prevention methods during your pregnancy? How about during breastfeeding? If so, tell me more about that experience.

**6a. Have you ever spoken with your partner/boyfriend / ex-boyfriend about how you can prevent HIV?**

- How did those conversations go?
- How open was he to ideas like using a condom?
- If you brought up something like PrEP, how would he respond?

**7a. Do you know your partners HIV status?**

- How did he disclose?
- How did you feel? Probe for denial / acceptance / violence

**If HIV positive**

**8b. When did you learn about being positive?**

- How did you feel about your HIV status when you learned it?
- How do you feel now?

**9b. Have you ever shared your status with your partner?**

- **For those who DID disclose:** May we talk about how you shared your status with your partner?
  - How did he respond to the disclosure?
  - Probe for denial / acceptance / violence
  - **Was your partner aware of the process to receive HIV medication?**
  - If yes, was he supportive?
  - If no, did you decide not to tell him for a certain reason?
- **For those who DID NOT disclose:** Why did you chose not to tell your partner?
  - Did he ever find out some other way?
  - Probe for fears around denial / rejection / violence
  - Did you ever hide your treatment from your partner? Probe for stories.

**10b. Do you know your partners HIV status?**

- How did he disclose?
- How did you feel? Probe for denial / acceptance / violence

**11. How did your relationship change, if at all, by the HIV diagnosis?**

- For example, did it get worse or better after you learned you were positive?
- Did arguments or relationship violence change?
- Probe for stories

**12. What is your experience taking ARVs.**

- **KEY PROBE:** Did you take ARVs during pregnancy and breastfeeding period? If so, tell me about this experience.
- Probe on challenges with adherence and support they have from social networks.

**Wrap  
up**

**Thank you so much for taking part in this interview. Is there anything else you would like to discuss or elaborate on before we close?  
Again, we truly appreciate your participation in this study.**

## Supplemental Study: CAREGIVER FGD Guide

### INSTRUCTIONS for the Interviewer: How to use the FGD Guide

1. Section topics are shaded in gray.
2. *Instructions/suggestions to interviewer are in italics and [brackets].*
3. Not ALL questions need to be asked. It is up to your discretion if a question should be skipped if the participant has already provided a response to the question earlier in the interview. Please ensure that by the end of the interview, all the topics and key themes have been covered.
4. There are two levels of questions:
  - a. Primary interview questions: appear in **bold** text. They address the topics that you as the interviewer should ask and discuss with participants. You are not required to read them verbatim, but they are written to ensure some consistency across FGDs.
5. Probing topics are indicated with a bullet. If you find that the participant does not provide much information in response to the primary question, these probing topics may be used to encourage further discussion. Probes with the words “KEY PROBE” written before them are the most important to try to address. Depending on what has already been discussed, and the IDI context, you may or may not ask the rest of the probes.
6. Words found in (parentheses) are meant to provide wording options to interviewers to fit various situations. For example, they often provide a present or past tense verb.
7. The FGD guide is not meant to be used to take notes. Rather, you should use separate notetaking paper, where you will also include your initials, the participants’ PTID, as well as the date, start and end time of the interview.

**Before starting the FGD, ensure that the participants have provided written informed consent.**

|                                                                                                                                                                                                                                                                                                                                                                                                                                                                                                                                                                                                                                                                                                                                                                                                                                                                                                                                                                                                                                                                                                                      |
|----------------------------------------------------------------------------------------------------------------------------------------------------------------------------------------------------------------------------------------------------------------------------------------------------------------------------------------------------------------------------------------------------------------------------------------------------------------------------------------------------------------------------------------------------------------------------------------------------------------------------------------------------------------------------------------------------------------------------------------------------------------------------------------------------------------------------------------------------------------------------------------------------------------------------------------------------------------------------------------------------------------------------------------------------------------------------------------------------------------------|
| Introduction                                                                                                                                                                                                                                                                                                                                                                                                                                                                                                                                                                                                                                                                                                                                                                                                                                                                                                                                                                                                                                                                                                         |
| <p>[Interviewer should explain the following points – PLEASE DO NOT READ VERBATIM:]</p> <ul style="list-style-type: none"> <li>• Purpose of IDI: <ul style="list-style-type: none"> <li>○ Understand the barriers AGYW face accessing and utilizing ANC and PNC services</li> <li>○ Understand the facilitators that enable AGYW to seek and utilize ANC/PNC services</li> <li>○ Understand social support provided to AGYW during pregnancy and postpartum</li> </ul> </li> <li>• Affirm that all answers are valid: there are no right or wrong answers.</li> <li>• Remind participant that interview is confidential, so identifying information won't be shared outside of the study. Participants will remain anonymous in any external publications or presentations.</li> <li>• Tell participant to use pseudonyms for themselves and anyone else they mention so as to preserve confidentiality.</li> </ul> <p>Turn audio recorder on and then ask participant to confirm for audio recorder that they agree to participate in the FGD. <i>[Be sure to get a verbal confirmation before continuing.]</i></p> |
| Section A: Background                                                                                                                                                                                                                                                                                                                                                                                                                                                                                                                                                                                                                                                                                                                                                                                                                                                                                                                                                                                                                                                                                                |
| <p><b>1. To get us started, I would like you to tell me about yourself.</b></p> <ul style="list-style-type: none"> <li>• What do you do? Family etc.</li> </ul>                                                                                                                                                                                                                                                                                                                                                                                                                                                                                                                                                                                                                                                                                                                                                                                                                                                                                                                                                      |
| Core Section B: ANC and PNC Services                                                                                                                                                                                                                                                                                                                                                                                                                                                                                                                                                                                                                                                                                                                                                                                                                                                                                                                                                                                                                                                                                 |
| <p><b>2. Tell us about your loved one's antenatal care experience.</b></p> <ul style="list-style-type: none"> <li>• <b>KEY PROBE:</b> Did your loved one start antenatal care? Do you know at what point in their pregnancy that they started antenatal care?</li> <li>• <b>KEY PROBE:</b> What barriers or challenges did your loved one face in starting antenatal care? How about continuing antenatal care?</li> <li>• <b>KEY PROBE:</b> What are some things that made it easy for your loved one to start antenatal care? How about continuing antenatal care?</li> <li>• <b>KEY PROBE:</b> What do you think are some of the reasons pregnant adolescent and young women start ANC visit very late?</li> <li>• Probe on the different levels that the AGYW interacts with that influences attendance from the intrapersonal to societal (e.g., self, family/friends, community, clinic).</li> </ul>                                                                                                                                                                                                           |
| <p><b>3. Now we would like to hear about your loved one's birthing experience.</b></p> <ul style="list-style-type: none"> <li>• <b>KEY PROBE:</b> Where did your loved one give birth from? Do you think that there were any barriers for your loved one in giving birth at a health facility and if so, what were these barriers?</li> <li>• <b>KEY PROBE:</b> What are the things that made it easier for your loved one to give birth at a health facility?</li> <li>• Probe on the different levels that the AGYW interacts with that influences attendance from the intrapersonal to societal (e.g., self, family/friends, community, clinic).</li> </ul>                                                                                                                                                                                                                                                                                                                                                                                                                                                       |

**4. Now let's talk about your loved one's postnatal care experience.**

- **KEY PROBE:** How has it been with your loved one attending her postnatal visits?
- **KEY PROBE:** What challenges or barriers did your loved one face in starting her postnatal care?
- **KEY PROBE:** What made/has made it easy for your loved one to start postnatal care?
- **KEY PROBE:** What do you think are the challenges your loved one faced/might face in continuing postnatal care?
- **KEY PROBE:** What do you think will make/has made it easier for your loved one to continue postnatal care?
- Probe on the different levels that the AGYW interacts with that influences attendance from the intrapersonal to societal (e.g., self, family/friends, community, clinic).

**5. What suggestions do you have to improve young women's, similar to your loved one, experiences with antenatal care? What about postnatal care?**

Section C: Social support

**6. What support did your daughter receive during pregnancy? E.g., from home, clinic, or community?**

- Probe on type of support e.g., emotional, financial, and other forms of support.

**7. What role have you played in her health decision-making after delivery?**

- **Key Probe:** How would you describe the support that have you provided your loved one after delivery?
- Probe on whether the caregiver feels that they have adequate knowledge, information, and support to help them guide their loved one in making the right decisions.
- What resources do they think would help them further support their loved one?
- Probe on the use of traditional healers, providers, etc.

Optional Section D: Reproductive Health (If time allows – please ask)

**8. Do you have conversations with your loved one regarding their reproductive health?**

- What is the nature of conversations that you and your loved one have when addressing reproductive health?
- Do you think that she has these types of conversations with other people?
- What would you think is her source of information for topics related to reproductive health? Probe on contraceptive use, HIV prevention (e.g., PrEP use), HIV treatment (ART use and adherence).
- **KEY PROBE:** Can you tell us about your loved one's experiences with using HIV prevention or treatment during pregnancy or after delivery?

**9. What do you think are some other important things to help girls and young women prevent HIV? (e.g., schools, community, clinics, household, etc.)**

**WRAP UP.**

**Thank you! You have answered all of my questions. Thank you for taking the time to share your opinions with me today. I truly appreciate your willingness to participate and discuss your thoughts with me.**
